## Index of Authors and Titles

- AFFARA, N. A. *See* FERGUSON-SMITH, M. A.  
 AMAR, L. *See* AVNER, P.  
 ARNAUD, D. *See* AVNER, P.  
 AVNER, P., BISHOP, C., AMAR, L., CAMBROU, J., HATAT, D.,  
 ARNAUD, D. *and* MATTEI, M.-G. Mapping the mouse X  
 chromosome: possible symmetry in the location of a  
 family of sequences on the mouse X and Y  
 chromosomes 107
- BALLABIO, A. *See* FRASER, N.  
 BANTING, G. *See* GOODFELLOW, P. J.  
 BISHOP, C. *See* AVNER, P.  
 BISHOP, C. E. *See* LEROY, P.  
 BISHOP, C. E., ROBERTS, C., MICHOT, J.-L., NAGAMINE, C.,  
 WINKING, H., GUÉNET, J.-L. *and* WEITH, A. The use of  
 specific DNA probes to analyse the *Sxr* mutation in the  
 mouse 167  
 BURGOYNE, P. S. The role of the mammalian Y  
 chromosome in spermatogenesis 133
- CAMBROU, J. *See* AVNER, P.  
 CHANDLER, P. *See* SIMPSON, E.  
 COOKE, H. J. Telomeres of the human X and Y  
 chromosomes 101  
 CRAIG, I. *See* FRASER, N.  
 CRAIG, I., LEVY, E. *and* FRASER, N. The mammalian Y  
 chromosome: molecular search for the sex-determining  
 gene – summary and perspectives 185
- DARLING, S. *See* GOODFELLOW, P. J.  
 DE LA CHAPELLE, A. The Y-chromosomal and autosomal  
 testis-determining genes 33  
 DISTECHE, C. M. *See* SIMPSON, E.  
 DURBIN, E. J. *See* ERICKSON, R. P.
- ERICKSON, R. P., DURBIN, E. J. *and* TRES, L. L. Sex  
 determination in mice: Y and chromosome 17  
 interactions 25
- FELLOUS, M. *See* LEROY, P.  
 FERGUSON-SMITH, M. A. *See* SIMPSON, E.  
 FERGUSON-SMITH, M. A., AFFARA, N. A. *and* MAGENIS, R. E.  
 Ordering of Y-specific sequences by deletion mapping  
 and analysis of X–Y interchange males and females 41  
 FRASER, N. *See* CRAIG, I.  
 FRASER, N., BALLABIO, A., ZOLLO, M., PERSICO, G. *and* CRAIG,  
 I. Identification of incomplete coding sequences for  
 steroid sulphatase on the human Y chromosome:  
 evidence for an ancestral pseudoautosomal gene? 127
- GOODFELLOW, P. J., DARLING, S., BANTING, G., PYM, B.,  
 MONDELLO, C. *and* GOODFELLOW, P. N. Pseudoautosomal  
 genes in man 119  
 GOODFELLOW, P. N. Mapping the Y chromosome 39  
 GOODFELLOW, P. N. *See* GOODFELLOW, P. J.  
 GOODFELLOW, P. N. *See* PRITCHARD, C. A.  
 GOULMY, E. *See* SIMPSON, E.  
 GUÉNET, J.-L. *See* BISHOP, C. E.
- HATAT, D. *See* AVNER, P.  
 HODGKIN, J. Primary sex determination in the nematode  
*C. elegans* 5
- JONES, K. W. *See* SINGH, L.
- LEROY, P., SEBOUN, E., MATTEI, M. G., FELLOUS, M. *and*  
 BISHOP, C. E. Testis-specific transcripts detected by a  
 human Y-DNA-derived probe 177  
 LEVILLIERS, J. *See* WEISSENBACH, J.  
 LEVY, E. *See* CRAIG, I.
- MAGENIS, R. E. *See* FERGUSON-SMITH, M. A.  
 MATSUKUMA, S. *See* SINGH, L.  
 MATTEI, M.-G. *See* AVNER, P.  
 MATTEI, M. G. *See* LEROY, P.  
 MICHOT, J.-L. *See* BISHOP, C. E.  
 MONDELLO, C. *See* GOODFELLOW, P. J.  
 MULLER, U. Mapping of testis-determining locus on Yp by  
 the molecular genetic analysis of XX males and XY  
 females 51  
 McLAREN, A. Clues from other animals and theoretical  
 considerations 3  
 McLAREN, A. *See* SIMPSON, E.
- NAGAMINE, C. *See* BISHOP, C. E.  
 NÖTHIGER, R. *and* STEINMANN-ZWICKY, M. Genetics of sex  
 determination: what can we learn from *Drosophila*? 17
- PAGE, D. C. Hypothesis: a Y-chromosomal gene causes  
 gonadoblastoma in dysgenetic gonads 151  
 PAGE, D. C. *See* SIMPSON, E.  
 PERSICO, G. *See* FRASER, N.  
 PETIT, C. *See* WEISSENBACH, J.  
 PRITCHARD, C. A. *and* GOODFELLOW, P. N. Genetic analysis  
 of the human Y chromosome by chromosome-mediated  
 gene transfer 59  
 PYM, B. *See* GOODFELLOW, P. J.
- ROBERTS, C. *See* BISHOP, C. E.  
 ROUYER, F. *See* WEISSENBACH, J.
- SCHERER, G. *See* WIBERG, U. F.  
 SCHMECKPEPER, B. J. *See* SMITH, K. D.  
 SEBOUN, E. *See* LEROY, P.  
 SIMMLER, M.-C. *See* WEISSENBACH, J.  
 SIMPSON, E., CHANDLER, P., McLAREN, A., GOULMY, E.,  
 DISTECHE, C. M., PAGE, D. C. *and* FERGUSON-SMITH, M. A.  
 Mapping the H-Y gene 157  
 SINGH, L., MATSUKUMA, S. *and* JONES, K. W. The use of Y-  
 chromosome-specific repeated DNA sequences in the  
 analysis of testis development in an XX/XY  
 mouse 143  
 SMITH, K. D., YOUNG, K. E., TALBOT, C. C. JR *and*  
 SCHMECKPEPER, B. J. Repeated DNA of the human Y  
 chromosome 77  
 SOUTHERN, E. Structural features of the Y  
 chromosome 75

200 *Index of Authors and Titles*

STEINMANN-ZWICKY, M. *See* NÖTHIGER, R.

TALBOT, C. C. JR *See* SMITH, K. D.

TRES, L. L. *See* ERICKSON, R. P.

TYLER-SMITH, C. Structure of repeated sequences in the centromeric region of the human Y chromosome 93

WEISSENBACH, J., LEVILLIERS, J., PETIT, C., ROUYER, F. *and* SIMMLER, M.-C. Normal and abnormal interchanges between the human X and Y chromosomes 67

WEITH, A. *See* BISHOP, C. E.

WIBERG, U. F. *and* SCHERER, G. Evidence for the presence of testicular tissue and S<sub>xy</sub> antigen in the absence of Y-derived sequences 163

WINKING, H. *See* BISHOP, C. E.

WOLFE, J. Other genes of the Y chromosome 117

YOUNG, K. E. *See* SMITH, K. D.

ZOLLO, M. *See* FRASER, N.
